# Supplementary material for: In Utero Exposure to Hormonal Contraception and Mortality in Offspring with and without Cancer: A Nationwide Cohort Study
Source: MDPI journal article supplement (doi:10.3390/cancers15123163), 2023-06-13
Supplement: s1 [file s1]

# Supplementary Materials: In Utero Exposure to Hormonal Contraception and Mortality in Offspring with and without Cancer: A Nationwide Cohort Study

Lina Steinrud Mørch <sup>1,\*</sup>, Mads Gamborg <sup>1</sup>, Caroline Hallas Hemmingsen <sup>2</sup>,  
Charlotte Wessel Skovlund <sup>1</sup>, Susanne Krüger Kjær <sup>2</sup> and Marie Hargreave <sup>2</sup>

<sup>1</sup> Cancer Surveillance and Pharmacoepidemiology, Danish Cancer Society Research Center, Strandboulevarden 49, 2100 Copenhagen, Denmark; maga@cancer.dk (M.G.); cws@cancer.dk (C.W.S.)

<sup>2</sup> Virus, Lifestyle, and Genes, Danish Cancer Society Research Center, Strandboulevarden 49, 2100 Copenhagen, Denmark; cahe@cancer.dk (C.H.H.); susanne@cancer.dk (S.K.K.); mariehar@cancer.dk (M.H.)

\* Correspondence: morch@cancer.dk; Tel.: +45-21203670

## **Table of Contents**

|                                                                                                                                                                           |           |
|---------------------------------------------------------------------------------------------------------------------------------------------------------------------------|-----------|
| <b>Table S1. Mortality in children who develop any type of cancer, leukemia or CNS tumor, according to maternal use of specific types of hormonal contraception. ....</b> | <b>2</b>  |
| <b>Table S2. ATC-codes and classification of hormonal contraception.....</b>                                                                                              | <b>3</b>  |
| <b>Table S3. Perinatal characteristics of the study cohort. ....</b>                                                                                                      | <b>4</b>  |
| <b>Table S4. Characteristics of children who developed any type of cancer.....</b>                                                                                        | <b>5</b>  |
| <b>Table S5. Characteristics of children who developed leukemia.....</b>                                                                                                  | <b>7</b>  |
| <b>Table S6. Characteristics of children who developed a CNS-tumor. ....</b>                                                                                              | <b>9</b>  |
| <b>Table S7. Type and dose of progestin in progestin-only products.....</b>                                                                                               | <b>11</b> |

**Table S1. Mortality in children who develop any type of cancer, leukemia or CNS tumor, according to maternal use of specific types of hormonal contraception.**

|                                      | Children with any type of cancers |                  |                  |                    | Children with leukemia |                   |                    |                  | Children with CNS-tumors |                  |              |                    |
|--------------------------------------|-----------------------------------|------------------|------------------|--------------------|------------------------|-------------------|--------------------|------------------|--------------------------|------------------|--------------|--------------------|
|                                      | Number of children                | Number of deaths | HR (95% CI)*     | Number of children | Number of deaths       | HR (95% CI)*      | Number of children | Number of deaths | Number of children       | Number of deaths | HR (95% CI)* | Number of children |
| <b>Any type</b>                      |                                   |                  |                  |                    |                        |                   |                    |                  |                          |                  |              |                    |
| Previous use                         | 1 864                             | 225              | 1 (reference)    | 548                | 52                     | 1 (reference)     | 446                | 84               | 1 (reference)            |                  |              |                    |
| <b>Combined contraceptives</b>       |                                   |                  |                  |                    |                        |                   |                    |                  |                          |                  |              |                    |
| <i>Oral contraception</i>            |                                   |                  |                  |                    |                        |                   |                    |                  |                          |                  |              |                    |
| Recent use                           | 251                               | 36               | 1.17 (0.82-1.67) | 76                 | 11                     | 1.34 (0.67-2.70)  | 63                 | 8                | 0.65 (0.32-1.33)         |                  |              |                    |
| During pregnancy                     | 35                                | 6                | 1.36 (0.62-2.94) | 10                 | <5 <sup>‡</sup>        | 2.78 (0.97-7.97)  | 8                  | <5 <sup>‡</sup>  | 0.76 (0.10-5.67)         |                  |              |                    |
| <b>Progestin-only contraceptives</b> |                                   |                  |                  |                    |                        |                   |                    |                  |                          |                  |              |                    |
| <i>Oral contraception</i>            |                                   |                  |                  |                    |                        |                   |                    |                  |                          |                  |              |                    |
| During pregnancy                     | 6                                 | <5 <sup>‡</sup>  | 1.48 (0.23-9.54) | <5 <sup>‡</sup>    | <5 <sup>‡</sup>        | 8.00 (1.44-44.39) |                    |                  |                          |                  |              |                    |
| <i>Non-oral contraceptives</i>       |                                   |                  |                  |                    |                        |                   |                    |                  |                          |                  |              |                    |
| Recent use                           | 1864                              | 7                | 1.51 (0.73-3.09) | 8                  | <5 <sup>‡</sup>        | 1.66 (0.25-10.80) | 15                 | <5 <sup>‡</sup>  | 1.52 (0.57-4.07)         |                  |              |                    |

Exposure categories with zero number of deaths are not shown.

During refers to use during pregnancy.

Recent use refers to use 3 months or less before pregnancy start (except for non-oral progestin only products [for further specification, see the method section]).

Previous use refers to use more than 3 months before pregnancy start (except for non-oral progestin only products [for further specification, see the method section]).

\*Stratified by year of birth (categories: 1996-1999, 2000-2004, 2005-2009, 2010-2014, 2015-2018) and maternal age at birth (categories: <28, 28-31, 32-35, >35).

‡Exact number <5 or equivalent is blinded according to the interpretation of General Data Protection Regulation by Statistics Denmark.

Of note, some HRs are not shown when estimation was not possible due to few observations.

HR = Hazard ratio.

**Table S2. ATC-codes and classification of hormonal contraception.**

| <b>Type of hormonal<br/>contraception</b> | <b>ATC-code(s)</b>                                                                                |
|-------------------------------------------|---------------------------------------------------------------------------------------------------|
| <b>Combined<br/>contraception</b>         |                                                                                                   |
| <i>Oral</i>                               | G03AA01, G03AA03, G03AA05, G03AA07, G03AA09-12, G03AA14, G03AA16<br>G03AB03-06, G03AB8<br>G03HB01 |
| <i>Non-oral</i>                           | G02BB01<br>G03AA13                                                                                |
| <b>Progestin-only<br/>contraception</b>   |                                                                                                   |
| <i>Oral</i>                               | G03AC01-03<br>G03AC09                                                                             |
| <i>Non-oral</i>                           | G02BA03, G03DA02*<br>G03AC06, G03AC08                                                             |
| <b>Emergency<br/>contraception</b>        | G03AD01, G03AD                                                                                    |

ATC = anatomical therapeutic chemical.

\*Only drugs with the trade name Depo-Provera.

**Table S3. Perinatal characteristics of the study cohort.**

| Perinatal factors                             | No. (%)                   |                             |                             |                  |
|-----------------------------------------------|---------------------------|-----------------------------|-----------------------------|------------------|
|                                               | During pregnancy          | Recent use                  | Previous use                | No use           |
| <b>Number of children</b>                     | 17 513 (1.2) <sup>a</sup> | 154 381 (10.8) <sup>b</sup> | 952 800 (66.8) <sup>c</sup> | 301 698 (21.2)   |
| <i>Cesarean delivery</i>                      | 3 068 (17.5)              | 29 020 (18.8)               | 197 227 (20.7)              | 55 622 (18.4)    |
| Missing                                       | 0 (0.0)                   | 0 (0.0)                     | 0 (0.0)                     | 0 (0.0)          |
| <i>Birth weight (g)</i>                       |                           |                             |                             |                  |
| <2500                                         | 970 (5.5)                 | 7 594 (4.9)                 | 48 264 (5.1)                | 16 012 (5.3)     |
| 2500-4500                                     | 15 950 (91.1)             | 141 205 (91.5)              | 871 763 (91.5)              | 274 446 (91.0)   |
| >4500                                         | 487 (2.8)                 | 4 847 (3.1)                 | 28 054 (2.9)                | 9 250 (3.1)      |
| Missing                                       | 106 (0.6)                 | 735 (0.5)                   | 4 719 (0.5)                 | 1 990 (0.7)      |
| Median (IQR)                                  | 3490 (3110-3835)          | 3520 (3170-3870)            | 3510 (3156-3860)            | 3500 (3120-3850) |
| <i>Gestational length (wk)</i>                |                           |                             |                             |                  |
| <37                                           | 1 233 (7.0)               | 9 894 (6.4)                 | 64 405 (6.8)                | 19 366 (6.4)     |
| 37-42                                         | 16 233 (92.7)             | 144 192 (93.4)              | 887 207 (93.1)              | 281 125 (93.2)   |
| >42                                           | 47 (0.3)                  | 295 (0.2)                   | 1 188 (0.1)                 | 1 207 (0.4)      |
| Missing                                       | 0 (0.0)                   | 0 (0.0)                     | 0 (0.0)                     | 0 (0.0)          |
| Median (IQR)                                  | 40 (38-40)                | 40 (39-41)                  | 40 (38-40)                  | 40 (39-41)       |
| <i>Multiplicity</i>                           | 395 (2.3)                 | 5 502 (3.6)                 | 37 807 (4.0)                | 13 618 (4.5)     |
| Missing                                       | 0 (0.0)                   | 0 (0.0)                     | 0 (0.0)                     | 0 (0.0)          |
| <i>Down syndrome<sup>d</sup></i>              | 14 (0.1)                  | 85 (0.05)                   | 596 (0.1)                   | 338 (0.1)        |
| Missing                                       | 0 (0.0)                   | 0 (0.0)                     | 0 (0.0)                     | 0 (0.0)          |
| <i>Neurofibromatosis<sup>e</sup></i>          | 11 (0.1)                  | 71 (0.05)                   | 390 (0.04)                  | 141 (0.05)       |
| Missing                                       | 0 (0.0)                   | 0 (0.0)                     | 0 (0.0)                     | 0 (0.0)          |
| <i>Other congenital disorders<sup>f</sup></i> | 1 885 (10.8)              | 16 485 (10.7)               | 101 972 (10.7)              | 32 737 (10.8)    |
| Missing                                       | 0 (0.0)                   | 0 (0.0)                     | 0 (0.0)                     | 0 (0.0)          |

<sup>a</sup>During refers to use during pregnancy.<sup>b</sup>Recent use refers to use 3 months or less before pregnancy start (except for non-oral progestin only products [for further specification, see the method section]).<sup>c</sup>Previous use refers to use more than 3 months before pregnancy start (except for non-oral progestin only products [for further specification, see the method section]).<sup>d</sup>ICD-10 code Q90\*<sup>e</sup>ICD-10 code Q85\*<sup>f</sup>ICD-10 code Q00-Q99\* (excluding codes Q85\* and Q90\*).

Abbreviations: BMI = body mass index. wk = weeks. g = grams. No = number. IQR = interquartile range, ICD = International Classification of Diseases (ICD) codes version ICD-10.

**Table S4. Characteristics of children who developed any type of cancer.**

| Characteristics                                | No. (%)                |                         |                           |                      |
|------------------------------------------------|------------------------|-------------------------|---------------------------|----------------------|
|                                                | During pregnancy       | Recent use              | Previous use              | No use               |
| <b>No. of children with any type of cancer</b> | 43 (1.4) <sup>a</sup>  | 304 (10.0) <sup>b</sup> | 1 864 (61.6) <sup>c</sup> | 816 (27.0)           |
| <b>Child characteristics</b>                   |                        |                         |                           |                      |
| <i>Year of birth</i>                           |                        |                         |                           |                      |
| 1996-1999                                      | 14 (32.6)              | 98 (32.2)               | 489 (26.2)                | 565 (69.2)           |
| 2000-2004                                      | 17 (40.5)              | 88 (29.0)               | 589 (31.6)                | 146 (17.9)           |
| 2005-2009                                      | <10 (<15) <sup>£</sup> | 70 (23.3)               | 451 (24.2)                | 76 (9.3)             |
| 2010-2014                                      | 6 (14.3)               | 37 (12.3)               | 269 (14.6)                | 24 (2.9)             |
| 2015-2018                                      | <5 (<5) <sup>£</sup>   | 11 (3.7)                | 66 (3.6)                  | 5 (0.6)              |
| Median (IQR)                                   | 2002 (2000-2007)       | 2003 (1999-2009)        | 2004 (2000-2009)          | 1998 (1997-2002)     |
| <i>Sex</i>                                     |                        |                         |                           |                      |
| Male                                           | 28 (65.1)              | 165 (54.3)              | 978 (52.5)                | 434 (53.2)           |
| Female                                         | 15 (34.9)              | 139 (45.7)              | 879 (47.2)                | 381 (46.7)           |
| Missing                                        | 0 (0.0)                | 0 (0.0)                 | 7 (0.4)                   | <5 (<1) <sup>£</sup> |
| <i>Birth order</i>                             |                        |                         |                           |                      |
| First                                          | 19 (44.2)              | 141 (46.4)              | 851 (46.7)                | 295 (36.2)           |
| Second or higher                               | 24 (55.8)              | 163 (53.6)              | 1 014 (54.4)              | 519 (63.6)           |
| Missing                                        | 0 (0.0)                | 0 (0.0)                 | 0 (0.0)                   | <5 (<1) <sup>£</sup> |
| <b>Parental characteristics</b>                |                        |                         |                           |                      |
| <i>Origin (mother)</i>                         |                        |                         |                           |                      |
| Danish or descendant of immigrant <sup>d</sup> | <40 (<95) <sup>£</sup> | 290 (95.4)              | 1 746 (94.4)              | 620 (76.0)           |
| Immigrant                                      | <5 (<10) <sup>£</sup>  | 14 (4.6)                | 104 (5.6)                 | 196 (24.0)           |
| Missing                                        | 0 (0.0)                | 0 (0.0)                 | 0 (0.0)                   | 0 (0.0)              |
| <i>BMI<sup>£</sup> (mother)</i>                |                        |                         |                           |                      |
| <25                                            | 8 (19.1)               | 80 (26.7)               | 612 (32.8)                | 79 (9.7)             |
| 25-30                                          | <10 (<20) <sup>£</sup> | 47 (15.7)               | 227 (12.2)                | 29 (3.6)             |
| 31-35                                          | <5 (<5) <sup>£</sup>   | 9 (3.0)                 | 93 (5.0)                  | 13 (1.6)             |
| >35                                            | <5 (<5) <sup>£</sup>   | 5 (1.7)                 | 52 (2.8)                  | 6 (0.7)              |
| Missing                                        | 25 (58.1)              | 159 (53)                | 880 (47.2)                | 689 (84.4)           |
| <i>Maternal education<sup>e</sup></i>          |                        |                         |                           |                      |
| Basic                                          | 14 (32.6)              | 69 (22.7)               | 375 (20.1)                | 179 (21.9)           |
| Vocational                                     | 22 (51.2)              | 136 (44.7)              | 796 (42.7)                | 360 (44.1)           |
| Higher                                         | 7 (16.3)               | 96 (31.6)               | 667 (35.8)                | 200 (24.5)           |
| Missing                                        | 0 (0.0)                | <5 (<5) <sup>£</sup>    | 26 (1.4)                  | 77 (9.4)             |
| <i>Paternal education<sup>e</sup></i>          |                        |                         |                           |                      |
| Basic                                          | 10 (23.3)              | 60 (19.7)               | 377 (20.2)                | 171 (21.0)           |
| Vocational                                     | 22 (51.2)              | 170 (55.9)              | 903 (48.4)                | 362 (44.4)           |
| Higher                                         | 6 (14.0)               | 68 (22.4)               | 531 (28.5)                | 211 (25.9)           |
| Missing                                        | 5 (11.6)               | 6 (2)                   | 53 (2.8)                  | 72 (8.8)             |
| <i>Maternal age at birth (y)</i>               |                        |                         |                           |                      |
| <28                                            | 21 (48.8)              | 131 (43.1)              | 573 (30.7)                | 209 (25.6)           |

|                                         |                        |                      |            |            |
|-----------------------------------------|------------------------|----------------------|------------|------------|
| 28-31                                   | 11 (25.6)              | 100 (32.9)           | 650 (34.9) | 263 (32.2) |
| 31-35                                   | <10 (<20) <sup>‡</sup> | 49 (16.1)            | 419 (22.5) | 198 (24.3) |
| >35                                     | <5 (<10) <sup>‡</sup>  | 24 (7.9)             | 222 (11.9) | 146 (17.9) |
| Missing                                 | 0 (0.0)                | 0 (0.0)              | 0 (0.0)    | 0 (0.0)    |
| Median (IQR)                            | 28 (25-32)             | 28 (25-31)           | 30 (27-33) | 31 (27-34) |
| <i>Paternal age at birth (y)</i>        |                        |                      |            |            |
| <28                                     | 10 (23.3)              | 84 (27.6)            | 351 (18.8) | 112 (13.7) |
| 28-31                                   | 14 (32.6)              | 103 (33.8)           | 573 (30.7) | 189 (23.2) |
| 31-35                                   | 10 (23.3)              | 59 (19.4)            | 491 (26.3) | 231 (28.3) |
| >35                                     | <10 (<15) <sup>‡</sup> | 57 (18.8)            | 435 (23.3) | 270 (33.1) |
| Missing                                 | <5 (<10) <sup>‡</sup>  | <5 (<5) <sup>‡</sup> | 14 (0.8)   | 14 (1.7)   |
| Median (IQR)                            | 31 (27-33)             | 30 (27-34)           | 32 (28-35) | 33 (30-37) |
| <i>Maternal smoking<sup>f</sup>*</i>    |                        |                      |            |            |
| Missing                                 | 6 (14.0)               | 35 (11.5)            | 139 (7.5)  | 181 (22.2) |
| <i>Maternal infertility<sup>g</sup></i> |                        |                      |            |            |
| Missing                                 | 0 (0.0)                | 0 (0.0)              | 0 (0.0)    | 0 (0.0)    |

<sup>a</sup>During refers to use during pregnancy

<sup>b</sup>Recent use refers to use 3 months or less before pregnancy start or during pregnancy (except for non-oral progestin only products (for further specification, see the method section)).

<sup>c</sup>Previous use refers to use more than 3 months before pregnancy start (except for non-oral progestin only products (for further specification, see the method section)).

<sup>d</sup>Defined as having 2 parents without Danish citizenship and who were not born in Denmark.

<sup>e</sup>Highest attained education before birth of the child. Basic indicates mandatory school grades 9-10; vocational, secondary school and vocational education; higher, short-, medium-, and long-term higher education.

<sup>f</sup>Maternal smoking measured in the first trimester of pregnancy. \*Information on maternal smoking was only available from 1998 onwards.

<sup>g</sup>ICD-8 code 628 and ICD-10 code N97.

<sup>h</sup>Information on BMI was only available from 2004 onwards.

<sup>i</sup>Exact number <5 or equivalent is blinded according the interpretation of General Data Protection Regulation by Statistics Denmark.

Abbreviations: BMI = body mass index. wk = weeks. No = number. IQR = interquartile range, ICD = International Classification of Diseases (ICD) codes version ICD-10.

**Table S5. Characteristics of children who developed leukemia.**

| Characteristics                                | No. (%)                |                        |                         |                       |
|------------------------------------------------|------------------------|------------------------|-------------------------|-----------------------|
|                                                | During pregnancy       | Recent use             | Previous use            | No use                |
| <b>No. of children with leukemia</b>           | 13 (1.6) <sup>a</sup>  | 86 (10.5) <sup>b</sup> | 548 (66.6) <sup>c</sup> | 176 (21.4)            |
| <b>Child characteristics</b>                   |                        |                        |                         |                       |
| <i>Year of birth</i>                           |                        |                        |                         |                       |
| 1996-1999                                      | 5 (38.5)               | 30 (34.9)              | 118 (21.5)              | 102 (58.0)            |
| 2000-2004                                      | 5 (38.5)               | 22 (25.6)              | 180 (32.9)              | 37 (21.0)             |
| 2005-2009                                      | <5 (<5) <sup>£</sup>   | 22 (25.6)              | 141 (25.7)              | 31 (17.6)             |
| 2010-2014                                      | <5 (<25) <sup>£</sup>  | <15 (<15) <sup>£</sup> | 89 (16.2)               | 6 (3.4)               |
| 2015-2018                                      | 0 (0.0)                | <5 (<5) <sup>£</sup>   | 20 (3.7)                | 0 (0.0)               |
| Median (IQR)                                   | 2001 (2000-2005)       | 2004 (1999-2008)       | 2005 (2001-2009)        | 2000 (1997-2004)      |
| <i>Sex</i>                                     |                        |                        |                         |                       |
| Male                                           | 6 (46.2)               | 47 (54.7)              | 278 (50.7)              | 109 (61.9)            |
| Female                                         | 7 (53.9)               | 39 (45.4)              | 268 (48.9)              | 67 (38.1)             |
| Missing                                        | 0 (0.0)                | 0 (0.0)                | <5 (<1) <sup>£</sup>    | 0 (0.0)               |
| <i>Birth order</i>                             |                        |                        |                         |                       |
| First                                          | 5 (38.5)               | 37 (43.0)              | 254 (46.4)              | 63 (35.8)             |
| Second or higher                               | 8 (61.5)               | 49 (57.0)              | 294 (53.7)              | 113 (64.2)            |
| Missing                                        | 0 (0.0)                | 0 (0.0)                | 0 (0.0)                 | 0 (0.0)               |
| <b>Parental characteristics</b>                |                        |                        |                         |                       |
| <i>Origin (mother)</i>                         |                        |                        |                         |                       |
| Danish or descendant of immigrant <sup>d</sup> | <15 (<95) <sup>£</sup> | 83 (96.5)              | 514 (93.8)              | 128 (72.7)            |
| Immigrant <sup>d</sup>                         | <5 (<10) <sup>£</sup>  | <5 (<5) <sup>£</sup>   | 34 (6.2)                | 48 (27.3)             |
| Missing                                        | 0 (0.0)                | 0 (0.0)                | 0 (0.0)                 | 0 (0.0)               |
| <i>BMI<sup>£</sup> (mother)</i>                |                        |                        |                         |                       |
| <25                                            | <5 (<25) <sup>£</sup>  | 25 (29.1)              | 202 (36.9)              | 25 (14.2)             |
| 25-30                                          | <5 (<10) <sup>£</sup>  | 12 (14.0)              | 69 (12.6)               | 10 (5.7)              |
| 31-35                                          | <5 (<10) <sup>£</sup>  | <10 (<10) <sup>£</sup> | 28 (5.1)                | <10 (<5) <sup>£</sup> |
| >35                                            | 0 (0)                  | <5 (<5) <sup>£</sup>   | 14 (2.6)                | <5 (<5) <sup>£</sup>  |
| Missing                                        | 8 (61.5)               | 42 (48.8)              | 235 (42.9)              | 132 (75.0)            |
| <i>Maternal education<sup>e</sup></i>          |                        |                        |                         |                       |
| Basic                                          | <5 (<25) <sup>£</sup>  | 17 (19.8)              | 105 (19.2)              | 33 (18.8)             |
| Vocational                                     | <10 (<60) <sup>£</sup> | 46 (53.5)              | 230 (43.0)              | 90 (51.1)             |
| Higher                                         | <5 (<25) <sup>£</sup>  | 22 (25.6)              | 206 (37.6)              | 39 (22.2)             |
| Missing                                        | 0 (0.0)                | <5 (<5) <sup>£</sup>   | 7 (1.3)                 | 14 (8.0)              |
| <i>Paternal education<sup>e</sup></i>          |                        |                        |                         |                       |
| Basic                                          | <5 (<10) <sup>£</sup>  | 10 (11.6)              | 104 (19.0)              | 29 (16.5)             |
| Vocational                                     | 8 (61.5)               | 53 (61.6)              | 274 (50.0)              | 91 (51.7)             |
| Higher                                         | <5 (<20) <sup>£</sup>  | 21 (24.4)              | 157 (28.7)              | 38 (21.6)             |
| Missing                                        | <5 (<20) <sup>£</sup>  | <5 (<5) <sup>£</sup>   | 13 (2.4)                | 18 (10.2)             |
| <i>Maternal age at birth (y)</i>               |                        |                        |                         |                       |
| <28                                            | 5 (38.5)               | 32 (37.2)              | 160 (29.2)              | 42 (23.9)             |



|                                         |                       |                      |                      |                      |
|-----------------------------------------|-----------------------|----------------------|----------------------|----------------------|
| 28-31                                   | <5 (<25) <sup>£</sup> | 29 (33.7)            | 179 (32.7)           | 47 (26.7)            |
| 31-35                                   | <5 (<25) <sup>£</sup> | 20 (23.3)            | 136 (24.8)           | 38 (21.6)            |
| >35                                     | <5 (<20) <sup>£</sup> | 5 (5.8)              | 73 (13.3)            | 49 (27.8)            |
| Missing                                 | 0 (0.0)               | 0 (0.0)              | 0 (0.0)              | 0 (0.0)              |
| Median (IQR)                            | 31 (27-32)            | 29 (25-32)           | 30 (27-33)           | 31 (28-36)           |
| <i>Paternal age at birth (y)</i>        |                       |                      |                      |                      |
| <28                                     | <5 (<20) <sup>£</sup> | 23 (26.7)            | 94 (17.2)            | 16 (9.1)             |
| 28-31                                   | <5 (<20) <sup>£</sup> | 28 (32.6)            | 162 (29.6)           | 33 (18.8)            |
| 31-35                                   | <5 (<35) <sup>£</sup> | 16 (18.6)            | 143 (26.1)           | 51 (29.0)            |
| >35                                     | <5 (<35) <sup>£</sup> | 19 (22.1)            | 145 (26.5)           | 73 (41.5)            |
| Missing                                 | <5 (<10) <sup>£</sup> | 0 (0)                | <5 (<1) <sup>£</sup> | <5 (<2) <sup>£</sup> |
| Median (IQR)                            | 33 (30-37)            | 30 (27-34)           | 32 (29-36)           | 34 (31-39)           |
| <i>Maternal smoking<sup>f*</sup></i>    |                       |                      |                      |                      |
|                                         | <5 (<20) <sup>£</sup> | 15 (17.4)            | 70 (12.8)            | 23 (13.1)            |
| Missing                                 | <5 (<25) <sup>£</sup> | 8 (9.3)              | 31 (5.7)             | 29 (16.5)            |
| <i>Maternal infertility<sup>g</sup></i> |                       |                      |                      |                      |
|                                         | 0 (0.0)               | <5 (<5) <sup>£</sup> | 47 (8.6)             | 37 (21.0)            |
| Missing                                 | 0 (0.0)               | 0 (0.0)              | 0 (0.0)              | 0 (0.0)              |

<sup>a</sup>During refers to use during pregnancy

<sup>b</sup>Recent use refers to use 3 months or less before pregnancy start or during pregnancy (except for non-oral progestin only products (for further specification, see the method section)).

<sup>c</sup>Previous use refers to use more than 3 months before pregnancy start (except for non-oral progestin only products (for further specification, see the method section)).

<sup>d</sup>Defined as having 2 parents without Danish citizenship and who were not born in Denmark.

<sup>e</sup>Highest attained education before birth of the child. Basic indicates mandatory school grades 9-10; vocational, secondary school and vocational education; higher, short-, medium-, and long-term higher education.

<sup>f</sup>Maternal smoking measured in the first trimester of pregnancy. <sup>\*</sup>Information on maternal smoking was only available from 1998 onwards.

<sup>g</sup>ICD-8 code 628 and ICD-10 code N97.

<sup>h</sup>Information on BMI was only available from 2004 onwards.

<sup>£</sup>Exact number <5 or equivalent is blinded according the interpretation of General Data Protection Regulation by Statistics Denmark.

Abbreviations: BMI = body mass index. wk = weeks. No = number. IQR = interquartile range, ICD = International Classification of Diseases (ICD) codes version ICD-10.

**Table S6. Characteristics of children who developed a CNS-tumor.**

| Characteristics                                | No. (%)                |                         |                         |                      |
|------------------------------------------------|------------------------|-------------------------|-------------------------|----------------------|
|                                                | During pregnancy       | Recent use              | Previous use            | No use               |
| <b>No. of children with CNS-tumors</b>         | 9 (1.2) <sup>a</sup>   | 81 (10.7) <sup>b</sup>  | 446 (58.9) <sup>c</sup> | 221 (29.2)           |
| <b>Child characteristics</b>                   |                        |                         |                         |                      |
| <i>Year of birth</i>                           |                        |                         |                         |                      |
| 1996-1999                                      | <5 (<25) <sup>£</sup>  | 20 (24.7)               | 115 (25.8)              | 159 (72.0)           |
| 2000-2004                                      | 6 (66.7)               | 23 (28.4)               | 153 (34.3)              | 38 (17.2)            |
| 2005-2009                                      | 0 (0.0)                | 23 (28.4)               | 110 (24.7)              | 19 (8.6)             |
| 2010-2014                                      | 0 (0.0)                | <15 (<15) <sup>£</sup>  | 51 (11.4)               | 5 (2.3)              |
| 2015-2018                                      | <5 (<15) <sup>£</sup>  | <5 (<5) <sup>£</sup>    | 17 (3.8)                | 0 (0.0)              |
| Median (IQR)                                   | 2004 (2002-2005)       | 2005 (2001-2009)        | 2004 (2000-2009)        | 1998 (1997-2001)     |
| <i>Sex</i>                                     |                        |                         |                         |                      |
| Male                                           | <10 (<80)              | 39 (48.2)               | 216 (48.4)              | 97 (43.9)            |
| Female                                         | <5 (<25) <sup>£</sup>  | 42 (51.9)               | 229 (51.4)              | 124 (56.1)           |
| Missing                                        | 0 (0.0)                | 0 (0.0)                 | <5 (<1) <sup>£</sup>    | 0 (0.0)              |
| <i>Birth order</i>                             |                        |                         |                         |                      |
| First                                          | <5 (<45) <sup>£</sup>  | 33 (40.7)               | 193 (43.3)              | 77 (34.8)            |
| Second or higher                               | <10 (<60) <sup>£</sup> | 48 (59.3)               | 253 (56.7)              | 142 (64.3)           |
| Missing                                        | 0 (0.0)                | 0 (0.0)                 | 0 (0.0)                 | 0 (0.0)              |
| <b>Parental characteristics</b>                |                        |                         |                         |                      |
| <i>Origin (mother)</i>                         |                        |                         |                         |                      |
| Danish or descendant of immigrant <sup>d</sup> | <10 (<90) <sup>£</sup> | <80 (<100) <sup>£</sup> | 417 (93.5)              | 181 (81.9)           |
| Immigrant <sup>d</sup>                         | <5 (<15) <sup>£</sup>  | <5 (<5) <sup>£</sup>    | 29 (6.5)                | 40 (18.1)            |
| Missing                                        | 0 (0.0)                | 0 (0.0)                 | 0 (0.0)                 | 0 (0.0)              |
| <i>BMI<sup>§</sup> (mother)</i>                |                        |                         |                         |                      |
| <25                                            | <5 (<25) <sup>£</sup>  | 20 (24.7)               | 137 (30.8)              | 18 (8.1)             |
| 25-30                                          | <5 (<25) <sup>£</sup>  | 16 (19.8)               | 49 (11.0)               | 5 (2.3)              |
| 31-35                                          | 0 (0.0)                | <5 (<5) <sup>£</sup>    | 29 (6.5)                | <5 (<5) <sup>£</sup> |
| >35                                            | <5 (<15) <sup>£</sup>  | <5 (<5) <sup>£</sup>    | 18 (4.0)                | <5 (<5) <sup>£</sup> |
| Missing                                        | <5 (<45) <sup>£</sup>  | 41 (50.6)               | 213 (47.8)              | 196 (88.7)           |
| <i>Maternal education<sup>e</sup></i>          |                        |                         |                         |                      |
| Basic                                          | <5 (<45) <sup>£</sup>  | 22 (27.2)               | 103 (23.1)              | 51 (23.1)            |
| Vocational                                     | <10 (<60) <sup>£</sup> | 37 (45.7)               | 166 (37.2)              | 100 (45.3)           |
| Higher                                         | 0 (0.0)                | 20 (24.7)               | 170 (38.1)              | 53 (24.0)            |
| Missing                                        | 0 (0.0)                | <5 (<5) <sup>£</sup>    | 7 (1.6)                 | 17 (7.7)             |
| <i>Paternal education<sup>e</sup></i>          |                        |                         |                         |                      |
| Basic                                          | <5 (<35) <sup>£</sup>  | 18 (22.2)               | 84 (18.8)               | 55 (24.9)            |
| Vocational                                     | <10 (<60) <sup>£</sup> | 49 (60.5)               | 225 (50.5)              | 95 (43.0)            |
| Higher                                         | 0 (0.0)                | 12 (14.8)               | 121 (27.1)              | 50 (22.6)            |
| Missing                                        | <5 (<15) <sup>£</sup>  | <5 (<5) <sup>£</sup>    | 16 (3.6)                | 21 (9.5)             |
| <i>Maternal age at birth (y)</i>               |                        |                         |                         |                      |
| <28                                            | <10 (<80) <sup>£</sup> | 36 (44.4)               | 139 (31.2)              | 59 (26.7)            |

|                                         |                       |                      |                      |            |
|-----------------------------------------|-----------------------|----------------------|----------------------|------------|
| 28-31                                   | <5 (<15) <sup>£</sup> | 28 (34.6)            | 163 (36.6)           | 75 (33.9)  |
| 31-35                                   | 0 (0.0)               | 12 (14.8)            | 91 (20.4)            | 51 (23.1)  |
| >35                                     | <5 (<15) <sup>£</sup> | 5 (6.2)              | 53 (11.9)            | 36 (16.3)  |
| Missing                                 | 0 (0.0)               | 0 (0.0)              | 0 (0.0)              | 0 (0.0)    |
| Median (IQR)                            | 25 (24-27)            | 28 (25-31)           | 30 (27-33)           | 30 (27-34) |
| <i>Paternal age at birth (y)</i>        |                       |                      |                      |            |
| <28                                     | <5 (<35) <sup>£</sup> | 19 (23.5)            | 94 (21.1)            | 30 (13.6)  |
| 28-31                                   | <5 (<45) <sup>£</sup> | 31 (38.3)            | 143 (32.1)           | 64 (29.0)  |
| 31-35                                   | 0 (0.0)               | 14 (17.3)            | 115 (25.8)           | 55 (24.9)  |
| >35                                     | <5 (<15) <sup>£</sup> | 17 (21.0)            | 91 (20.4)            | 66 (29.9)  |
| Missing                                 | <5 (11.1)             | 0 (0.0)              | <5 (<5) <sup>£</sup> | 6 (2.7)    |
| Median (IQR)                            | 29 (24-31)            | 30 (28-34)           | 31 (28-35)           | 32 (29-37) |
| <i>Maternal smoking<sup>f*</sup></i>    |                       |                      |                      |            |
| Missing                                 | <5 (<15) <sup>£</sup> | 9 (11.1)             | 27 (6.0)             | 53 (24.0)  |
| <i>Maternal infertility<sup>g</sup></i> |                       |                      |                      |            |
| Missing                                 | 0 (0.0)               | <5 (<5) <sup>£</sup> | 33 (7.4)             | 29 (13.1)  |
| Missing                                 | 0 (0.0)               | 0 (0.0)              | 0 (0.0)              | 0 (0.0)    |

<sup>a</sup>During refers to use during pregnancy

<sup>b</sup>Recent use refers to use 3 months or less before pregnancy start or during pregnancy (except for non-oral progestin only products (for further specification, see the method section)).

<sup>c</sup>Previous use refers to use more than 3 months before pregnancy start (except for non-oral progestin only products (for further specification, see the method section)).

<sup>d</sup>Defined as having 2 parents without Danish citizenship and who were not born in Denmark.

<sup>e</sup>Highest attained education before birth of the child. Basic indicates mandatory school grades 9-10; vocational, secondary school and vocational education; higher, short-, medium-, and long-term higher education.

<sup>f</sup>Maternal smoking measured in the first trimester of pregnancy. <sup>\*</sup>Information on maternal smoking was only available from 1998 onwards.

<sup>g</sup>ICD-8 code 628 and ICD-10 code N97.

<sup>h</sup>Information on BMI was only available from 2004 onwards.

<sup>£</sup>Exact number <5 or equivalent is blinded according the interpretation of General Data Protection Regulation by Statistics Denmark.

Abbreviations: BMI = body mass index. wk = weeks. No = number. IQR = interquartile range, ICD = International Classification of Diseases (ICD) codes version ICD-10.

**Table S7. Type and dose of progestin in progestin-only products.**

| <b>Hormonal contraception</b>       | <b>ATC-code(s)</b> | <b>Product</b>                        | <b>DDD</b> | <b>U</b> |
|-------------------------------------|--------------------|---------------------------------------|------------|----------|
| <b>Progestin-only contraception</b> |                    |                                       |            |          |
| <i>Oral</i>                         |                    |                                       |            |          |
|                                     | G03AC01            | Norethisterone                        | 0.35/300   | mg/mcg   |
|                                     | G03AC02            | Lynestrenol                           | 0.5        | mg       |
|                                     | G03AC03            | Levonorgestrel                        | 30         | mcg      |
|                                     | G03AC09            | Desogestrel                           | 75         | mcg      |
| <i>Non-oral</i>                     |                    |                                       |            |          |
|                                     | G02BA03            | Levonorgestrel                        | 13.5       | mg       |
|                                     | G03DA02            | Medroxyprogesterone<br>(Depo-Provera) | 5          | mg       |
|                                     | G03AC06            | Medroxyprogesterone<br>(Depo-Provera) | 5          | mg       |
|                                     | G03AC08            | Etonogestrel                          | 68         | mcg      |

Abbreviations: DDD = defined daily dose, U = unit, mg = milligram, mcg = microgram.

ATC = anatomical therapeutic chemical
